# Supplementary material
Source: HighWire-hosted journal article supplement (https://www.cmajopen.ca/highwire/filestream/87951/field_highwire_adjunct_files/4/open-2021-0046-gripp-checklist.pdf)
Supplement: open-2021-0046-gripp-checklist.pdf [file open-2021-0046-gripp-checklist.pdf]

Supplementary Material : GRIPP 2 short form

| GRIPP reporting item          | Description                                                                                                                                          | Section Reported                                                  |
|-------------------------------|------------------------------------------------------------------------------------------------------------------------------------------------------|-------------------------------------------------------------------|
| 1. Aims                       | Report the aim of PPI in the study                                                                                                                   | Reported in introduction                                          |
| 2. Methods                    | Provide a clear description of methods used for PPI in the study                                                                                     | Reported in methods section                                       |
| 3. Study Results              | Outcomes: Report the results of PPI in the study, including both positive and negative outcomes                                                      | Reported in results sections and patient engagement section       |
| 4. Discussion and conclusions | Outcomes: Comment on the extent to which PPI influenced the study overall. Describe positive and negative effects                                    | Reported in patient engagement section and discussion/conclusions |
| 5. Critical perspective       | Comment critically on the PPI in the study, reflecting on the things that went well and those that did not, so others can learn from this experience | Reported in the patient engagement section                        |
